# Supplementary material for: Ceramide Phosphoethanolamine as a Possible Marker of Periodontal Disease
Source: MDPI journal article supplement (doi:10.3390/membranes12070655), 2022-06-25
Supplement: s1 [file s1]

## Supplementary

**Table S1:** Transition masses, dwell time and collision energies of multiple reaction monitoring (MRM) measurements of *T. forsythia* lipid sample.

| MRM transitions CPE series |               |              |                      |
|----------------------------|---------------|--------------|----------------------|
| Q1 Mass (amu)              | Q3 Mass (amu) | Dwell (msec) | Collision energy (V) |
| 605.7                      | 464.5         | 150          | 31                   |
| 631.7                      | 490.5         | 150          | 31                   |
| 633.7                      | 492.5         | 150          | 31                   |
| 635.7                      | 494.5         | 150          | 31                   |
| 647.7                      | 506.5         | 150          | 31                   |
| 649.7                      | 508.5         | 150          | 31                   |
| 659.7                      | 518.5         | 150          | 31                   |
| 661.7                      | 520.5         | 150          | 31                   |
| 663.7                      | 522.5         | 150          | 31                   |
| 675.7                      | 534.5         | 150          | 31                   |
| 677.7                      | 536.5         | 150          | 31                   |
| 687.7                      | 546.5         | 150          | 31                   |
| 689.7                      | 548.5         | 150          | 31                   |
| 691.7                      | 550.5         | 150          | 31                   |
| 703.7                      | 562.5         | 150          | 31                   |
| 717.7                      | 576.5         | 150          | 31                   |

| MRM transitions 2'-OH-DH-CPE series |               |              |                      |
|-------------------------------------|---------------|--------------|----------------------|
| Q1 Mass (amu)                       | Q3 Mass (amu) | Dwell (msec) | Collision energy (V) |
| 637.7                               | 496.5         | 200          | 31                   |
| 651.7                               | 510.5         | 200          | 31                   |
| 665.7                               | 524.5         | 200          | 31                   |
| 679.7                               | 538.5         | 200          | 31                   |
| 693.7                               | 552.5         | 200          | 31                   |
| 707.7                               | 566.5         | 200          | 31                   |
| 721.7                               | 580.5         | 200          | 31                   |

**Table S2:** Mass spectrometer MRM specific parameters.

| Triple quadrupole MS (SCIEX API 3000)<br>parameters |             |
|-----------------------------------------------------|-------------|
| Scan Type                                           | MRM         |
| Polarity                                            | Positive    |
| Scan Mode                                           | N/A         |
| Ion Source                                          | Turbo Spray |
| Resolution Q1                                       | Unit        |
| Resolution Q3                                       | Unit        |
| Intensity Threshold                                 | 0.00 cps    |
| Settling Time                                       | 0.0000 msec |
| MR Pause                                            | 5.0070 msec |

|           |          |
|-----------|----------|
| MCA       | No       |
| Step Size | 0.00 amu |
| NEB       | 8        |
| CUR       | 8        |
| IS        | 5000     |
| TEM       | 300      |
| CAD       | 4        |
| DP        | 60       |
| FP        | 250      |
| EP        | 10       |
| CE        | 31       |
| CXP       | 20       |

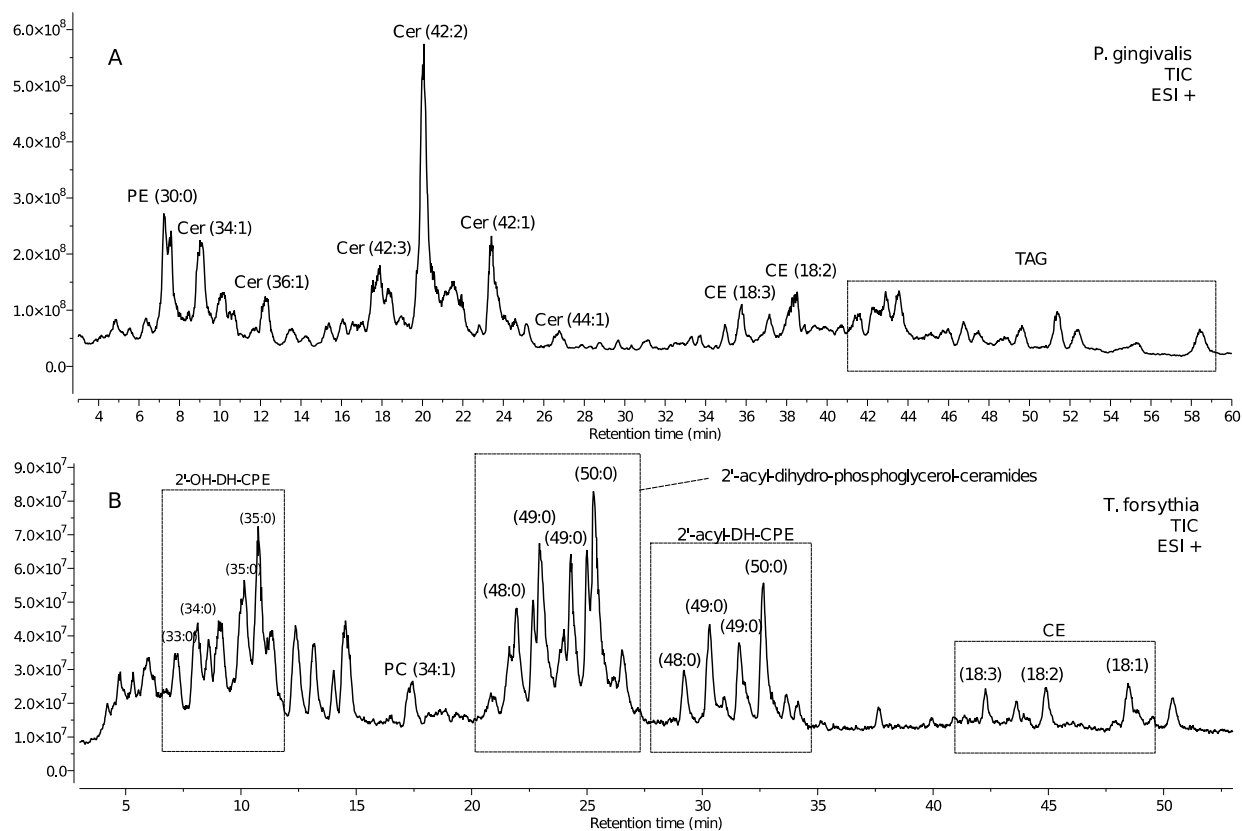

**Figure S1:** Total ion current (TIC) chromatograms of lipid extract of *P. gingivalis* (A) and *T. forsythia* (B). Main peaks are labelled with the corresponding, identified lipid. Note that *T. forsythia* chromatogram (B) presents 2'-acyl-dihydro-ceramides with phosphoglycerol head along with 2'-OH-DH- and 2'-acyl-DH- CPE.
